# Supplementary material for: Plant Growth Promotion by Volatile Organic Compounds Produced by Bacillus subtilis SYST2
Source: PubMed Central journal article supplement (PMC5293759; doi:10.3389/fmicb.2017.00171), 2017-02-07
Supplement: Data_Sheet_1.pdf [file Data_Sheet_1.pdf]

1           **Plant growth promotion by volatile organic compounds**  
2                           **produced by *Bacillus subtilis* SYST2**

3  
4 Hafiz Abdul Samad Tahir<sup>1+</sup>, Qin Gu<sup>1+</sup>, Huijun Wu<sup>1</sup>, Waseem Raza<sup>2</sup>, Alwina Hanif<sup>1</sup>, Liming  
5 Wu<sup>1</sup>, Massawe Venance Colman<sup>1</sup>, Xuewen Gao<sup>\*</sup>

6 <sup>1</sup>Department of Plant Pathology, College of Plant Protection, Nanjing Agricultural  
7 University, Key Laboratory of Integrated Management of Crop Diseases and Pests,  
8 Ministry of Education, Nanjing 210095, PR China

9 <sup>2</sup> Jiangsu Key Lab for Organic Solid Waste Utilization, Nanjing Agricultural University,  
10 Nanjing, China

11 <sup>1+</sup> Both authors contribute equally and share first authorship.

12 <sup>\*</sup> Corresponding author: Xuewen Gao

13 Address: Nanjing Agricultural University, Weigang No.1, Nanjing 210095, PR China

14 Email: gaoxw@njau.edu.cn

15 Telephone/Fax: 86-25-8439526

16

## 17 SUPPLEMENTARY INFORMATION

18 **Table S1: Primers used in the study**

| No | Oligo Name                         | Sequence 5' to 3'      |
|----|------------------------------------|------------------------|
| 1  | <i>EF-1<math>\alpha</math></i> (F) | AGACCACCAAGTACTACTGCAC |
| 2  | <i>EF-1<math>\alpha</math></i> (R) | CCACCAATCTTGTACACATCC  |
| 3  | <i>Exp2</i> (F)                    | TGTTGGAGGTGCTGGTGATA   |
| 4  | <i>Exp2</i> (R)                    | CCCCTTCAAAGTTTGTCCA    |
| 5  | <i>Exp9</i> (F)                    | GCTGGTATCGTCCCTGTTGT   |
| 6  | <i>Exp 9</i> (R)                   | CTGACCAACCAAAACGGAGT   |
| 7  | <i>Exp18</i> (F)                   | TGGCAGAGTGCTCATGCTAC   |
| 8  | <i>Exp18</i> (R)                   | ATGGCACCATTGTGGGTAGT   |
| 9  | <i>20-x1</i> (F)                   | ACGAGAAGCCTTGTGCCTTA   |
| 10 | <i>20-x1</i> (R)                   | AAAAGCGGCAACTCAAAGAA   |
| 11 | <i>SIIAA1</i> (F)                  | TGGATGGTGCCCCTTATCTA   |
| 12 | <i>SIIAA1</i> (R)                  | CCAAGGAACATCACCAACAA   |
| 13 | <i>SIIAA3</i> (F)                  | GCATGGATGGAGCACCTTAT   |
| 14 | <i>SIIAA3</i> (R)                  | ACATCACCAACAAGCATCCA   |
| 15 | <i>SICKX1</i> (F)                  | AACGATTGGTAGCGGACAAC   |
| 16 | <i>SICKX1</i> (R)                  | CTAACGCTCGCCTAATCACC   |
| 17 | <i>ACO1</i> (F)                    | TGCGCCATCTTCCTACTTCT   |
| 18 | <i>ACO1</i> (R)                    | CCTTGATCAAATCGGGCTTA   |

19

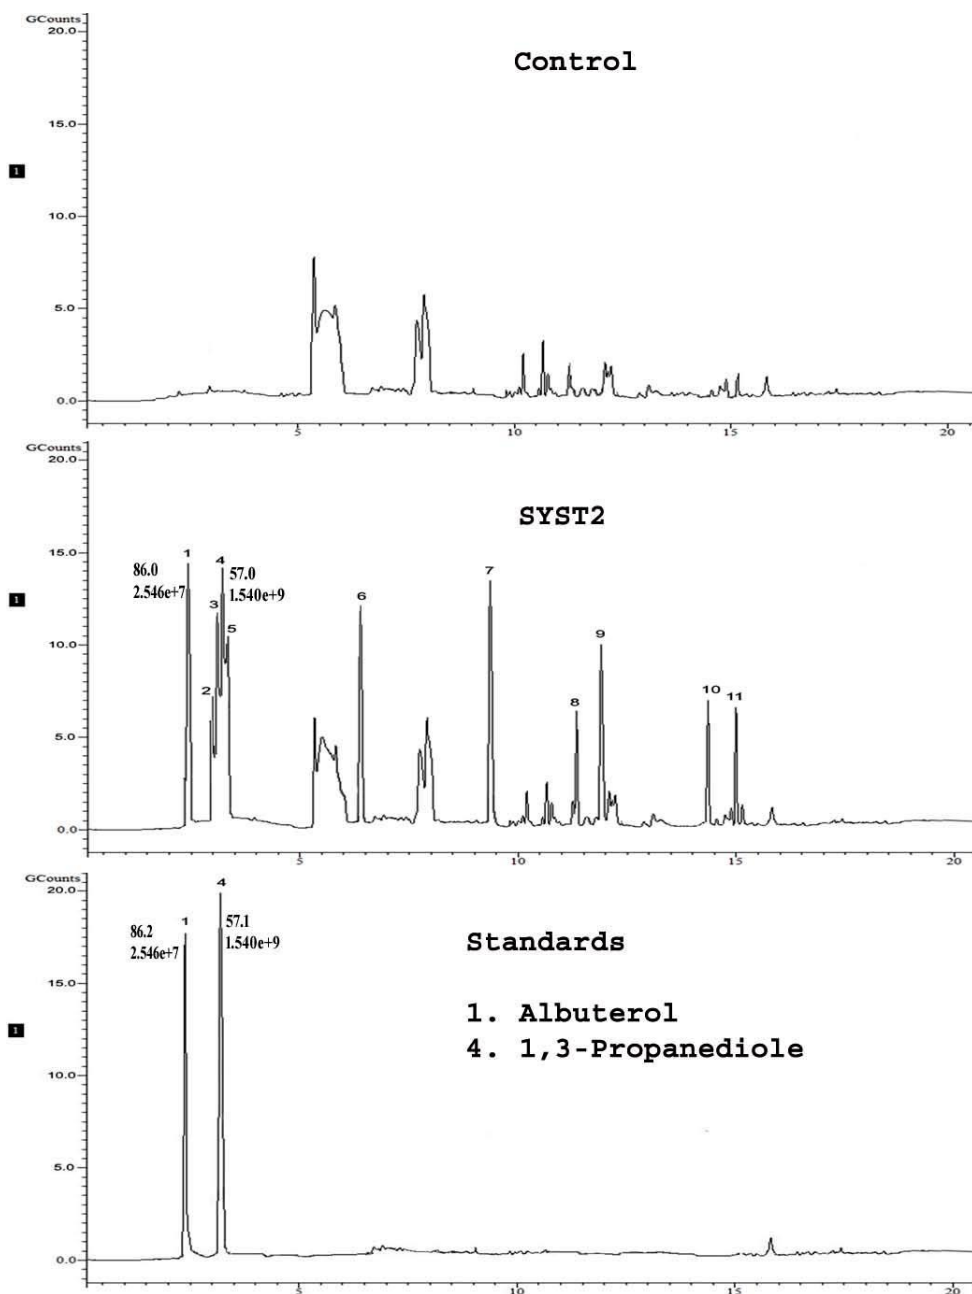

20

21 Figure S1: GC chromatograph of volatile organic compounds in control, produced by  
 22 *Bacillus subtilis* SYST2 and two standard volatile organic compounds (albuterol and  
 23 1,3-propanediol). 1= Albuterol; 2 = Methylphosphonic acid; 3 = 3-Methyl-3-buten-1-ol; 4  
 24 = 1,3-Propanediol,2-methyl-,dipropanoate; 5 = Dimethyl silanediol; 6 =  
 25 1,2-Benzenediol,3,5-bis(1,1-dimethylethyl); 7 = Cyclotetrasiloxane, octamethyl-; 8 =  
 26 1-Octanol,2-butyl; 9 = Benzoic acid; 10 = Cyclohexasiloxane, dodecamethyl-; 11=  
 27 Phenol,2-(1,1-dimethylethyl)-4-methyl. M/Z value of compound 1 and 4 is given in graph.
